# Supplementary material
Source: MDPI journal article supplement (https://www.mdpi.com/1999-4907/13/9/1429)
Supplement: s1 [file s1]

**Table S1.** List of *Serpula himantoides* sequences

| Area              | Code       | Origin      | GenBank accession number: ITS | Reference            |
|-------------------|------------|-------------|-------------------------------|----------------------|
| East Asia (Japan) | sawara1    | Japan       | LC038085 <sup>a</sup>         | This study           |
|                   | TUFC 12779 | Japan       | LC637886                      | This study           |
|                   | UTC3114221 | Japan       | LC630922                      | This study           |
|                   | UTC3114251 | Japan       | LC630921                      | This study           |
|                   | WD2171     | Japan       | LC637887                      | This study           |
|                   | WD2172     | Japan       | LC637888                      | This study           |
|                   | WD2173     | Japan       | LC637889                      | This study           |
|                   | WD2174     | Japan       | LC637890                      | This study           |
|                   | WD2175     | Japan       | LC637891                      | This study           |
|                   | WD2176     | Japan       | LC637892                      | This study           |
|                   | WD2177     | Japan       | LC637893                      | This study           |
|                   | WD2178     | Japan       | LC637894                      | This study           |
|                   | WD2179     | Japan       | LC637895                      | This study           |
|                   | WD2183     | Japan       | LC637896                      | This study           |
|                   | WD2184     | Japan       | LC637897                      | This study           |
|                   | WD2185     | Japan       | LC637898                      | This study           |
| Africa            | SH27       | Zimbabwe    | AM076507                      | Carlsen et al. [11]  |
| East Asia         | SH47       | India       | AJ557351                      | Kauserud et al. [41] |
|                   | SH48B      | India       | AJ557342                      | Kauserud et al. [41] |
| Europe            | SH127      | China       | HM135654                      | Carlsen et al. [11]  |
|                   | SH29       | France      | AM076509                      | Carlsen et al. [11]  |
|                   | SH31       | Norway      | AM076495                      | Carlsen et al. [11]  |
|                   | SH113      | Norway      | AM076497                      | Carlsen et al. [11]  |
|                   | SH51       | Denmark     | AJ557329                      | Kauserud et al. [41] |
|                   | SH36       | Estonia     | AJ557325                      | Kauserud et al. [41] |
| North America     | SH17       | Canada      | AM076494                      | Carlsen et al. [11]  |
|                   | SH18       | Canada      | AJ557357                      | Kauserud et al. [41] |
|                   | SH20       | Canada      | AM076492                      | Carlsen et al. [11]  |
|                   | SH141      | USA         | HM135655                      | Carlsen et al. [11]  |
|                   | SH164      | USA         | AM076493                      | Carlsen et al. [11]  |
| Oceania           | SH114      | New Zealand | AM076521                      | Carlsen et al. [11]  |
| South America     | SH168      | Chile       | HM135649                      | Carlsen et al. [11]  |
|                   | SH169      | Chile       | HM135650                      | Carlsen et al. [11]  |
|                   | SH171      | Argentina   | HM135690                      | Carlsen et al. [11]  |
|                   | SH172      | Argentina   | HM135691                      | Carlsen et al. [11]  |

**Table S2.** Primer sequences, names, GC %, and melting temperatures

| <b>Primer</b> | <b>Name</b> | <b>Nucleotide sequences</b> | <b>GC%</b> | <b>Melting temperature (T<sub>m</sub>) °C<sup>1</sup></b> |
|---------------|-------------|-----------------------------|------------|-----------------------------------------------------------|
| Forward       | SHF         | 5'-CTCGCATCGATGAAGAAC-3'    | 50.0       | 59.5                                                      |
| Reverse       | SHR         | 5'-CAAAACATTGTCTTACGACG-3'  | 40.0       | 58.3                                                      |

<sup>1</sup> Melting temperatures were calculated using the nearest-neighbor method.

**Table S3.** *Serpula himantioides* strains and other fungal species used in end-point PCR

| Fungal species               | Isolate code | Isolate number | Host plant species            | Source of isolation              | Locality of source       | Source <sup>1</sup> |
|------------------------------|--------------|----------------|-------------------------------|----------------------------------|--------------------------|---------------------|
| <i>Serpula himantioides</i>  | SH1          | sawra1         | <i>Chamaecyparis pisifera</i> | Decayed wood                     | Chichibu, Saitama, Japan | UTCF                |
|                              | SH2          | UTCF3114221    | <i>C. pisifera</i>            | Decayed wood                     | Chichibu, Saitama, Japan | UTCF                |
|                              | SH3          | WD2174         | <i>C. pisifera</i>            | Decayed wood                     | Mito, Ibaraki, Japan     | FFPRI               |
|                              | SH4          | TUFC 12779     | <i>Abies sachalinensis</i>    | Decaying and decorticated branch | Sapporo, Hokkaido, Japan | TUFC                |
| <i>Serpula lacrymans</i>     | SL           | NBRC30955      | Unknown                       | Coniferous timber                | Hokkaido, Japan          | NBRC                |
| <i>Coniophora puteana</i>    | CP           | WD1480         | Unknown                       | Basidiospores                    | Tottori, Japan           | FFPRI               |
| <i>Phaeolus schweinitzii</i> | PS           | NBRC6433       | Unknown                       | Unknown                          | Japan                    | NBRC                |
| <i>Postia floriformis</i>    | PF           | WD913          | <i>Larix kaempferi</i>        | Decay of butt                    | Shizuoka, Japan          | FFPRI               |
| <i>Veluticeps berkeleyi</i>  | VB           | WD26           | Unknown                       | Decayed wood                     | Nagano, Japan            | FFPRI               |
| <i>Lenzites betulinus</i>    | LB           | WD1351         | Unknown                       | Unknown                          | Yamagata, Japan          | FFPRI               |

<sup>1</sup> UTCF, The University of Tokyo Chichibu Forest, Japan; FFPRI, Forestry and Forest Products Research Institute, Japan; TUFC, Fungus/Mushroom Resource and Research Center, Tottori University, Japan; NBRC, Biological Resource Center, NITE, Japan.

**Table S4.** Size of decayed *Chamaecyparis pisifera* tree

| Tree number                    | CP1  | CP2  |
|--------------------------------|------|------|
| Age at time of cutting         | 88   | 90   |
| Diameter of breast height (cm) | 24.5 | 25.5 |
| Tree height (m)                | 28.0 | 27.8 |

**Table S5.** Details of the decayed wood samples

| Sample name | Collected tree | Sampling height(m) | Wood discoloration <sup>1</sup> |
|-------------|----------------|--------------------|---------------------------------|
| DWS_1       | CP1            | 1.8                | Moderate discoloration          |
| DWS_2       | CP1            | 1.9                | Moderate discoloration          |
| DWS_3       | CP1            | 2.0                | Moderate discoloration          |
| DWS_4       | CP1            | 2.2                | Non-discoloration               |
| DWS_5       | CP1            | 2.3                | Non-discoloration               |
| DWS_6       | CP1            | 2.4                | Non-discoloration               |
| DWS_7       | CP2            | 2.7                | Severe discoloration            |
| DWS_8       | CP2            | 2.9                | Severe discoloration            |
| DWS_9       | CP2            | 3.1                | Severe discoloration            |

**Table S6.** Absolute quantification of *Serpula himantoides* in decayed wood samples

| Sample name | Concentration of DNA<br>(ng/ $\mu$ L) | Number of DNA copies<br>(/ $\mu$ L) |
|-------------|---------------------------------------|-------------------------------------|
| DWS_1       | 0.49                                  | $4.53 \times 10^6$                  |
| DWS_2       | 0.42                                  | $3.46 \times 10^6$                  |
| DWS_3       | 0.25                                  | $2.36 \times 10^6$                  |
| DWS_4       | 0.12                                  | $1.51 \times 10^6$                  |
| DWS_5       | 0.22                                  | $1.66 \times 10^6$                  |
| DWS_6       | 0.11                                  | $3.21 \times 10^4$                  |
| DWS_7       | 0.29                                  | $1.99 \times 10^5$                  |
| DWS_8       | 0.44                                  | $3.01 \times 10^6$                  |
| DWS_9       | 0.04                                  | $7.78 \times 10^3$                  |

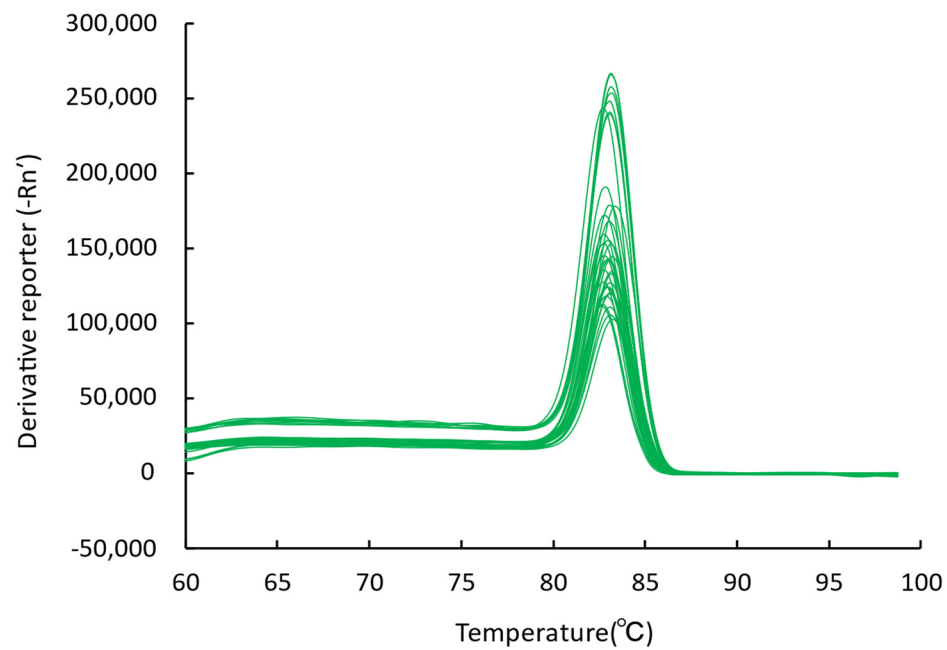

**Figure S1.** Melting curves of DNA extracted from decayed wood samples as measured by real-time PCR. The derivative reporter, displayed on the y-axis, was calculated as the negative first derivative of the normalized fluorescence ( $R_n$ ) generated by the reporter during PCR amplification.
